# Supplementary material
Source: Springer Nature journal article supplement (https://www.springermedizin.de/resource/supplementary/12903_2012_251_MOESM1_ESM.pdf/9516472)
Supplement: MOESM1 [file 9516472]

# Mouth Cancer Awareness in Dental Patients

- Try to answer all the questions.
- All the information you give will be treated in the strictest confidence.
- Once you have completed the questionnaire you should return it to the researcher or post it using the stamped envelope provided.

- For further information please contact:

**'Mouth Cancer Awareness Study'**

**Attn: Tunmise Awojobi**

Oral Health Services Research Unit

King's College London Dental Institute

Caldecot Road

Denmark Hill

London SE5 9RW

Tel 020 3299 4756

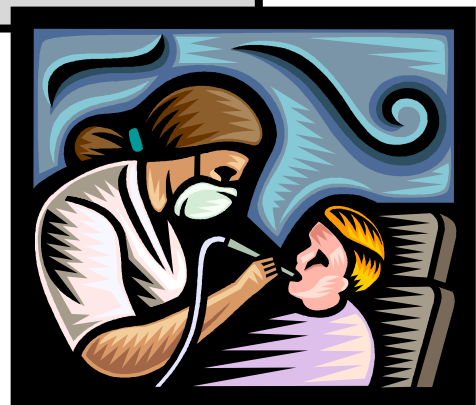

## SECTION A: These questions are about your use of healthcare services

**1. Before today's visit, how long ago was your last visit to the Dentist?**

Within the past year       1 to 2 years ago       More than 2 years ago

**2. In general do you go to the Dentist for:**

A regular check up       An occasional check up       Only when having trouble with your teeth

**3. When did you last visit your GP?**

Within the past year       1 to 2 years ago       More than 2 years ago       Never been to the GP

**4. For each of the following symptoms, please indicate which (if any) healthcare professional you would visit about that symptom. If you would not seek help for that symptom please tick the last column.**

|                                                                          | Doctor<br>(GP)           | Dentist                  | Pharmacist               | Other                    | I would not<br>seek help for<br>this symptom |
|--------------------------------------------------------------------------|--------------------------|--------------------------|--------------------------|--------------------------|----------------------------------------------|
| a) A white patch in the mouth that has lasted more than three weeks      | <input type="checkbox"/> | <input type="checkbox"/> | <input type="checkbox"/> | <input type="checkbox"/> | <input type="checkbox"/>                     |
| b) Dizziness that has lasted more than three weeks                       | <input type="checkbox"/> | <input type="checkbox"/> | <input type="checkbox"/> | <input type="checkbox"/> | <input type="checkbox"/>                     |
| c) A red patch in the mouth that has lasted more than three weeks        | <input type="checkbox"/> | <input type="checkbox"/> | <input type="checkbox"/> | <input type="checkbox"/> | <input type="checkbox"/>                     |
| d) Stomach ache that has lasted more than three weeks                    | <input type="checkbox"/> | <input type="checkbox"/> | <input type="checkbox"/> | <input type="checkbox"/> | <input type="checkbox"/>                     |
| e) A painful ulcer in the mouth that has lasted more than three weeks    | <input type="checkbox"/> | <input type="checkbox"/> | <input type="checkbox"/> | <input type="checkbox"/> | <input type="checkbox"/>                     |
| f) A yellow patch in the mouth that has lasted more than three weeks     | <input type="checkbox"/> | <input type="checkbox"/> | <input type="checkbox"/> | <input type="checkbox"/> | <input type="checkbox"/>                     |
| g) A rash on the face that has lasted more than three weeks              | <input type="checkbox"/> | <input type="checkbox"/> | <input type="checkbox"/> | <input type="checkbox"/> | <input type="checkbox"/>                     |
| h) A swelling in the mouth that has lasted more than three weeks         | <input type="checkbox"/> | <input type="checkbox"/> | <input type="checkbox"/> | <input type="checkbox"/> | <input type="checkbox"/>                     |
| i) A sore throat that has lasted more than three weeks                   | <input type="checkbox"/> | <input type="checkbox"/> | <input type="checkbox"/> | <input type="checkbox"/> | <input type="checkbox"/>                     |
| j) A headache that has lasted more than three weeks                      | <input type="checkbox"/> | <input type="checkbox"/> | <input type="checkbox"/> | <input type="checkbox"/> | <input type="checkbox"/>                     |
| k) Pain or discomfort in the mouth that has lasted more than three weeks | <input type="checkbox"/> | <input type="checkbox"/> | <input type="checkbox"/> | <input type="checkbox"/> | <input type="checkbox"/>                     |

**SECTION B: These questions are mainly about mouth cancer awareness**

**1. Have you ever heard of mouth cancer?**

Yes                      No                      Don't know/Not sure  
                                           

**2. Would you say you know a lot, some, a little, or nothing at all about mouth cancer?**

A lot                      Some                      A little                      Nothing at all                      Never heard of mouth cancer  
                                                                                       

**3. Are Dentists trained to check the mouth for signs of mouth cancer?**

Yes                      No                      Don't know/Not sure  
                                           

**4. Does *your* Dentist check your mouth for signs of mouth cancer during routine dental appointments?**

Yes                      No                      Don't know/Not sure  
                                           

**5. Has your mouth *ever* been checked for signs of mouth cancer by a Dentist?**

Yes                      No                      Don't know/Not sure  
                                           

**6. When was your mouth last checked for signs of mouth cancer?**

|                                         |                            |                          |                          |                          |                          |                                                                       |
|-----------------------------------------|----------------------------|--------------------------|--------------------------|--------------------------|--------------------------|-----------------------------------------------------------------------|
| Today<br>(This visit to the<br>Dentist) | Within<br>the past<br>year | 1 to 2<br>years<br>ago   | 2 to 3<br>years<br>ago   | Over 3<br>years<br>ago   | Don't know/<br>Not sure  | My mouth has<br>never been<br>checked for<br>signs of mouth<br>cancer |
| <input type="checkbox"/>                | <input type="checkbox"/>   | <input type="checkbox"/> | <input type="checkbox"/> | <input type="checkbox"/> | <input type="checkbox"/> | <input type="checkbox"/>                                              |

**7. During your dental appointment, has your Dentist ever felt under your chin and around your neck?**

Yes                      No                      Don't know/Not sure  
                                              
(go to question 8)    (go to question 9)    (go to question 9)



**13. For each of the following statements, indicate whether you think it is true or false.  
If you are unsure, have a guess.**

**People are more likely to get mouth cancer if they:** **True** **False**

- |                                               |                          |                          |
|-----------------------------------------------|--------------------------|--------------------------|
| a) Are over 50 years old                      | <input type="checkbox"/> | <input type="checkbox"/> |
| b) Smoke tobacco (cigarettes, cigars or pipe) | <input type="checkbox"/> | <input type="checkbox"/> |
| c) Drink strong tea                           | <input type="checkbox"/> | <input type="checkbox"/> |
| d) Drink strong 'filter' coffee               | <input type="checkbox"/> | <input type="checkbox"/> |
| e) Drink decaffeinated coffee                 | <input type="checkbox"/> | <input type="checkbox"/> |
| f) Chew tobacco                               | <input type="checkbox"/> | <input type="checkbox"/> |
| g) Drink alcohol heavily                      | <input type="checkbox"/> | <input type="checkbox"/> |
| h) Wear dentures                              | <input type="checkbox"/> | <input type="checkbox"/> |
| i) Eat hazel nuts                             | <input type="checkbox"/> | <input type="checkbox"/> |
| j) Overeat                                    | <input type="checkbox"/> | <input type="checkbox"/> |
| k) Are a man                                  | <input type="checkbox"/> | <input type="checkbox"/> |
| l) Are a woman                                | <input type="checkbox"/> | <input type="checkbox"/> |
| m) Have lost all their teeth                  | <input type="checkbox"/> | <input type="checkbox"/> |

**14. A check up for mouth cancer by a Dentist:** **True** **False**

- |                                                       |                          |                          |
|-------------------------------------------------------|--------------------------|--------------------------|
| a) Is painless                                        | <input type="checkbox"/> | <input type="checkbox"/> |
| b) Is not required if you wear false teeth            | <input type="checkbox"/> | <input type="checkbox"/> |
| c) Is carried out using x-rays                        | <input type="checkbox"/> | <input type="checkbox"/> |
| d) Is a way of finding mouth cancer at an early stage | <input type="checkbox"/> | <input type="checkbox"/> |
| e) Only takes a few minutes                           | <input type="checkbox"/> | <input type="checkbox"/> |
| f) Is carried out during routine dental check-ups     | <input type="checkbox"/> | <input type="checkbox"/> |
| g) Is only necessary for people over 70 years old     | <input type="checkbox"/> | <input type="checkbox"/> |

**SECTION C: The following questions are about your lifestyle.**

**1. How often do you have a drink that contains alcohol?**

- Never      Monthly or less      2 to 4 times a month      2 to 3 times a week      4 or more times a week
- 

**2. How many standard alcoholic drinks do you have on a typical day when you are drinking?**

- 0      1 to 2      3 to 4      5 to 6      7 to 9      10 or more
- 

**3. How often do you have 6 or more standard drinks on one occasion?**

- Never      Less than monthly      Monthly      Weekly
- 

**4. Do you smoke cigarettes at all nowadays?**

- Yes      No, but I used to smoke      No, I have never smoked
- 
- (go to question 5)*      *(go to question 5)*      *(go to question 9)*

**5. How soon after waking do (or did) you smoke your first cigarette of the day?**

- Less than 5 minutes      5 to 14 minutes      15 to 29 minutes      30 minutes but less than 1 hour      1 hour but less than 2 hours      2 hours or more
- 

**6. How many cigarettes a day do (or did) you usually smoke at weekends?**

\_\_\_\_\_

**7. How many cigarettes a day do (or did) you usually smoke on weekdays?**

\_\_\_\_\_

**8. If you have stopped smoking cigarettes regularly, how long ago did you stop?**

- |                           |                          |                          |                          |                           |
|---------------------------|--------------------------|--------------------------|--------------------------|---------------------------|
| 6 months to a<br>year ago | 1 to 2 years ago         | 2 to 5 years ago         | 5 to 10 years<br>ago     | More than 10<br>years ago |
| <input type="checkbox"/>  | <input type="checkbox"/> | <input type="checkbox"/> | <input type="checkbox"/> | <input type="checkbox"/>  |

**9. Do you use any other type of tobacco (e.g. chewing tobacco)?**

- |                          |                          |
|--------------------------|--------------------------|
| Yes                      | No                       |
| <input type="checkbox"/> | <input type="checkbox"/> |

**SECTION D: About You**

**1. What is your gender?**

- |                          |                          |
|--------------------------|--------------------------|
| Male                     | Female                   |
| <input type="checkbox"/> | <input type="checkbox"/> |

**2. What was your age on your last birthday?**

\_\_\_\_\_

**3. What is your marital status?**

- |                                   |                                                    |                                                       |                          |                          |                           |
|-----------------------------------|----------------------------------------------------|-------------------------------------------------------|--------------------------|--------------------------|---------------------------|
| Single, that is,<br>never married | Married and<br>living with<br>your<br>husband/wife | Married and<br>separated from<br>your<br>husband/wife | Divorced                 | Widowed                  | Other<br>(Please Specify) |
| <input type="checkbox"/>          | <input type="checkbox"/>                           | <input type="checkbox"/>                              | <input type="checkbox"/> | <input type="checkbox"/> | _____                     |

**4. To which of these ethnic groups do you belong?**

- |                          |                          |                           |                           |                          |                          |
|--------------------------|--------------------------|---------------------------|---------------------------|--------------------------|--------------------------|
| White                    | Mixed                    | Asian or<br>Asian British | Black or<br>Black British | Chinese                  | Other ethnic<br>group    |
| <input type="checkbox"/> | <input type="checkbox"/> | <input type="checkbox"/>  | <input type="checkbox"/>  | <input type="checkbox"/> | <input type="checkbox"/> |

**5. What is your highest educational qualification?**

\_\_\_\_\_

**6. Have you ever had mouth cancer?**

- |                          |                          |
|--------------------------|--------------------------|
| Yes                      | No                       |
| <input type="checkbox"/> | <input type="checkbox"/> |

**SECTION E: The following questions are about your job**

**1. Have you ever worked?**

Yes

(go to question 2)

No

(go to PAGE 10)

**The questions below refer to your current main job, or (if you are not working now) to your last main job. Please tick one box only for each question.**

**2. What is (was) your main occupation?**

\_\_\_\_\_

**3. Do (or did) you work as an employee or are (were) you self-employed?**

Employee

Self-employed with  
employees

Self-employed / freelance  
without employees

(go to question 6)

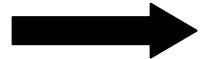

**4. For employees: indicate below how many people work (worked) for your employer at the place where you work (worked).**

**For self-employed: indicate below how many people you employ (employed).  
Go to question 4 when you have completed this question.**

1 to 24

25 or more

**5. Do (or did) you supervise any other employees?**

*A supervisor or foreman is responsible for overseeing the work of other employees on a day-to-day basis*

Yes

No



**6. Please tick one box to show which best describes the sort of work you do.**

**(If you are not working now, please tick a box to show what you did in your last job).**

***PLEASE TICK ONE BOX ONLY***

**Modern professional occupations**

*(such as: teacher - nurse - physiotherapist - social worker - welfare officer - artist - musician - police officer (sergeant or above) - software designer)*

**Clerical and intermediate occupations**

*(such as: secretary - personal assistant - clerical worker - office clerk - call centre agent - nursing auxiliary - nursery nurse)*

**Senior managers or administrators**

*(usually responsible for planning, organising and co-ordinating work and for finance. Such as: finance manager - chief executive)*

**Technical and craft occupations**

*(such as: motor mechanic - fitter - inspector - plumber - printer - tool maker - electrician - gardener - train driver)*

**Semi-routine manual and service occupations**

*(such as: postal worker - machine operative - security guard - caretaker - farm worker - catering assistant - receptionist - sales assistant)*

**Routine manual and service occupations**

*(such as: HGV driver - van driver - cleaner - porter - packer - sewing machinist - messenger - labourer - waiter / waitress - bar staff)*

**Middle or junior managers**

*(such as: office manager - retail manager - bank manager - restaurant manager - warehouse manager - publican)*

**Traditional professional occupations**

*(such as: accountant - solicitor - medical practitioner - scientist - civil / mechanical engineer)*

**Read the statement below and *tick the box* provided to give consent**

**Data Protection Statement**

I consent to the processing of my personal information for the purposes explained to me. I understand that such information will be treated in accordance with the terms of the Data Protection Act 1998

**THANK YOU FOR YOUR TIME**

*Return the completed questionnaire to the researcher  
or post it to us using the stamped envelope provided.*
